# Supplementary material for: Diverse reactivity of an Al(i)-centred anion towards ketones
Source: Royal Society of Chemistry journal article supplement (doi:10.1039/d2cc02333d), 2022-01-01
Supplement: d2cc02333d1.pdf [file d2cc02333d1.pdf]

## Experimental and Supplementary Information for

### Diverse Reactivity of an Al(I)-centred Anion Towards Ketones

Han-Ying Liu, Michael S. Hill\* and Mary F. Mahon

#### 1.1. General information

Except stated otherwise, all the experiments were conducted using standard Schlenk line and/or glovebox techniques under an inert atmosphere of argon. NMR spectra were recorded with an Agilent ProPulse spectrometer ( $^1\text{H}$  at 500 MHz,  $^{13}\text{C}$  at 126 MHz). The spectra are referenced relative to residual protio solvent resonances. Elemental analyses were performed at Elemental Microanalysis Ltd., Okehampton, Devon, UK. Solvents were dried by passage through a commercially available solvent purification system and stored under argon in ampoules over 4 Å molecular sieves.  $\text{C}_6\text{D}_6$  and  $\text{d}_8$ -THF was purchased from Sigma-Aldrich, dried over a potassium mirror before distilling and storage over molecular sieves.  $[\{\text{SiN}^{\text{Dipp}}\}\text{AlK}]_2$  (**8**) was prepared according to the reported procedure.<sup>1</sup> All other chemicals were purchased from Merck. Acetophenone, 2,4-dimethyl-3-pentanone and 2,2,4,4-tetramethyl-3-pentanone were degassed by three freeze-pump-thaw cycles and stored over 4 Å molecular sieves, while benzophenone was sublimed and stored in the glovebox under an argon atmosphere, before usage.

## 1.2. Synthetic Procedures

*Synthesis of  $K[\{\text{SiN}^{\text{Dipp}}\}\text{Al}-\kappa^2\text{-O}, \text{O}'\text{-}\{\text{OC}^{\text{Ph}}\}_2\text{C}^{\text{H}}(\text{CH}=\text{CHCH}=\text{CH})\text{C}=\text{C}^{\text{Ph}}\text{O}\}$  (11)*

In a J Young's tube, [ $\{\text{SiN}^{\text{Dipp}}\}\text{AlK}$ ]<sub>2</sub> (**8**, 28 mg, 0.025mmol), was dissolved in 0.4 mL of toluene before the addition of benzophenone (18mg, 0.10 mmol) to the bright yellow solution. The reaction mixture was then kept at 60 °C overnight to afford a colourless solution with bright yellow oil. THF was then added to the reaction mixture to afford a homogeneous bright yellow solution. Bright yellow single crystals suitable for X-ray crystallography were obtained by slow evaporation at room temperature. Yield 37 mg, 80%. Anal. Calcd. For C<sub>72</sub>H<sub>101</sub>AlKN<sub>2</sub>Si<sub>2</sub>O<sub>6</sub> (**11**(C<sub>4</sub>H<sub>8</sub>O)<sub>2</sub>, 1211.86) C, 71.30; H, 8.39; N, 2.31 %. Found: C, 70.84; H, 8.06, N, 2.70 %. The recrystallised yellow crystalline solids were then collected and put under vacuum before re-dissolved in d<sub>8</sub>-THF for NMR characterisation. <sup>1</sup>H NMR (500 MHz, 298K, THF-d<sub>8</sub>) δ 7.78-7.69 (m, 2H, ArH), 7.50-7.45 (m, 2H, ArH), 7.04-6.99 (m, 2H, ArH), 6.99-6.91 (m, 4H, ArH), 6.91-6.84 (m, 1H, ArH), 6.84-6.80 (m, 1H, ArH), 6.78 – 6.73 (m, 1H, ArH), 6.72 – 6.67 (m, 2H, ArH), 6.66 – 6.58 (m, 2H, ArH), 6.53-6.44 (m, 3H, ArH), 6.43 – 6.17 (m, 1H, ArH), 6.04 (d, J = 9.4 Hz, 1H, AlOC<sup>Ph</sup>=CCH=CH), 5.60 (dd, J = 9.8, 5.3 Hz, 1H, AlOC<sup>Ph2</sup>-CHCH=CH), 5.21 (dd, J = 9.8, 5.3 Hz, 1H, AlOC<sup>Ph2</sup>-CHCH=CH), 5.10 (dd, J = 9.4, 5.3 Hz, 1H, AlOC<sup>Ph</sup>=CCH=CH), 4.71-4.60 (m, 1H, CHMe<sub>2</sub>), 4.24 – 4.03 (m, 3H, CHMe<sub>2</sub>), 3.69 (d, J = 5.3 Hz, 1H, AlOC<sub>Ph2</sub>-CH), 1.48-1.39 (m, 1H, SiCH<sub>2</sub>) 1.30 (d, J = 6.7 Hz, 3H, CHMe<sub>2</sub>), 1.25-1.22 (m, 1H, SiCH<sub>2</sub>), 1.19 (d, J = 6.7 Hz, 3H, CHMe<sub>2</sub>), 1.15 (d, J = 6.7 Hz, 3H, CHMe<sub>2</sub>), 1.13 (d, J = 6.7 Hz, 3H, CHMe<sub>2</sub>), 1.02 (d, J = 6.7 Hz, 3H, CHMe<sub>2</sub>), 0.82 – 0.75 (m, 1H, SiCH<sub>2</sub>), 0.73 (s, 3H, SiMe<sub>2</sub>), 0.66-0.58 (m, 1H, SiCH<sub>2</sub>), 0.49 (d, J = 6.7 Hz, 3H, m, 1H, CHMe<sub>2</sub>), 0.46 (s, 3H, SiMe<sub>2</sub>), 0.41 (d, J = 6.7 Hz, 3H, CHMe<sub>2</sub>), 0.04 (d, J = 6.7 Hz, 3H, CHMe<sub>2</sub>), -0.45 (s, 3H, SiMe<sub>2</sub>), -0.55 (s, 3H, SiMe<sub>2</sub>). <sup>13</sup>C {<sup>1</sup>H} NMR (126 MHz, 298K, THF-d<sub>8</sub>) δ 162.2 (Al-OC<sup>Ph</sup>=C), 153.7 (ArC), 152.7 (ArC), 152.4 (ArC), 151.3 (ArC), 150.5 (ArC), 148.7 (ArC), 147.6 (ArC), 147.2 (ArC), 147.1 (ArC), 143.8 (ArC), 135.7 (ArC), 133.2 (ArC), 132.9 (ArC), 131.8 (ArC), 131.4 (AlOC<sup>Ph2</sup>-CHCH=CH) , 131.0 (ArC), 130.7 (ArC), 129.2 (ArC), 129.0 (ArC), 126.9 (ArC), 126.9 (ArC), 126.7 (ArC), 126.2 (ArC), 124.8 (ArC), 124.7 (ArC), 123.9 (ArC), 123.8 (ArC), 123.6 (ArC), 123.5 (ArC), 122.7 (AlOC<sup>Ph2</sup>-CHCH=CH), 121.7 (ArC), 121.6

(ArC), 112.0 (AlOC<sup>Ph</sup>=CCH=CH), 109.9 (AlOC<sup>Ph</sup>=C), 87.0 (AlOCPh<sub>2</sub>), 54.0 (AlOC<sup>Ph</sup><sub>2</sub>-CH), 27.9 (CHMe<sub>2</sub>), 27.9 (CHMe<sub>2</sub>), 27.8 (CHMe<sub>2</sub>), 27.8 (CHMe<sub>2</sub>), 27.7 (CHMe<sub>2</sub>), 27.6 (CHMe<sub>2</sub>), 27.4 (CHMe<sub>2</sub>), 27.0 (CHMe<sub>2</sub>), 26.6 (CHMe<sub>2</sub>), 26.3 (CHMe<sub>2</sub>), 25.4 (CHMe<sub>2</sub>), 24.8(CHMe<sub>2</sub>), 15.1 (SiCH<sub>2</sub>), 13.1 (SiCH<sub>2</sub>), 5.0 (SiMe<sub>2</sub>), 4.4 (SiMe<sub>2</sub>), 2.8 (SiMe<sub>2</sub>), 1.9 (SiMe<sub>2</sub>).

Figure S1.  $^1\text{H}$  NMR (500MHz, 298K,  $d_8$ -THF) spectrum of **11**. \*toluene

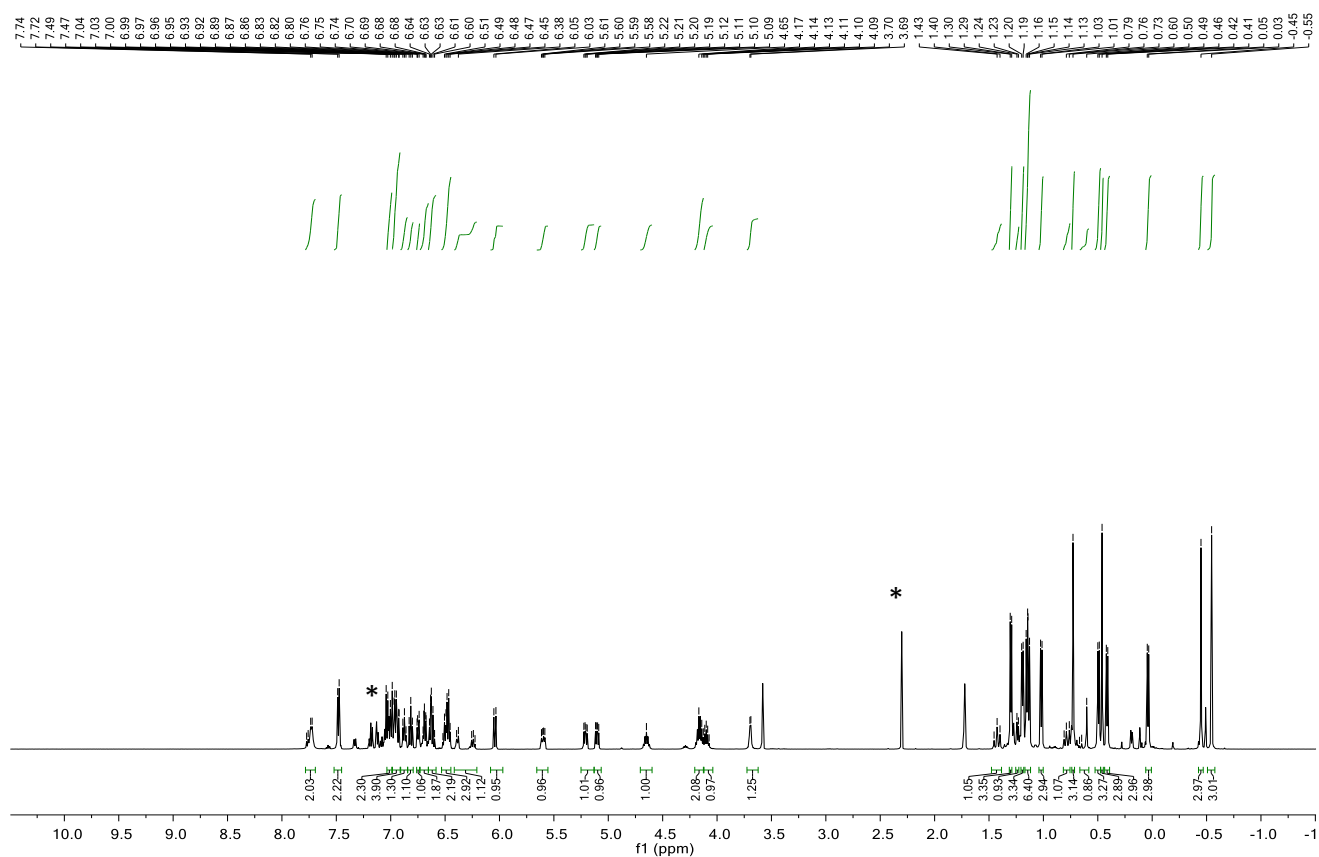

Figure S2.  $^{13}\text{C}\{^1\text{H}\}$  NMR (126MHz, 298K,  $d_8$ -THF) spectrum of **11**. \*toluene

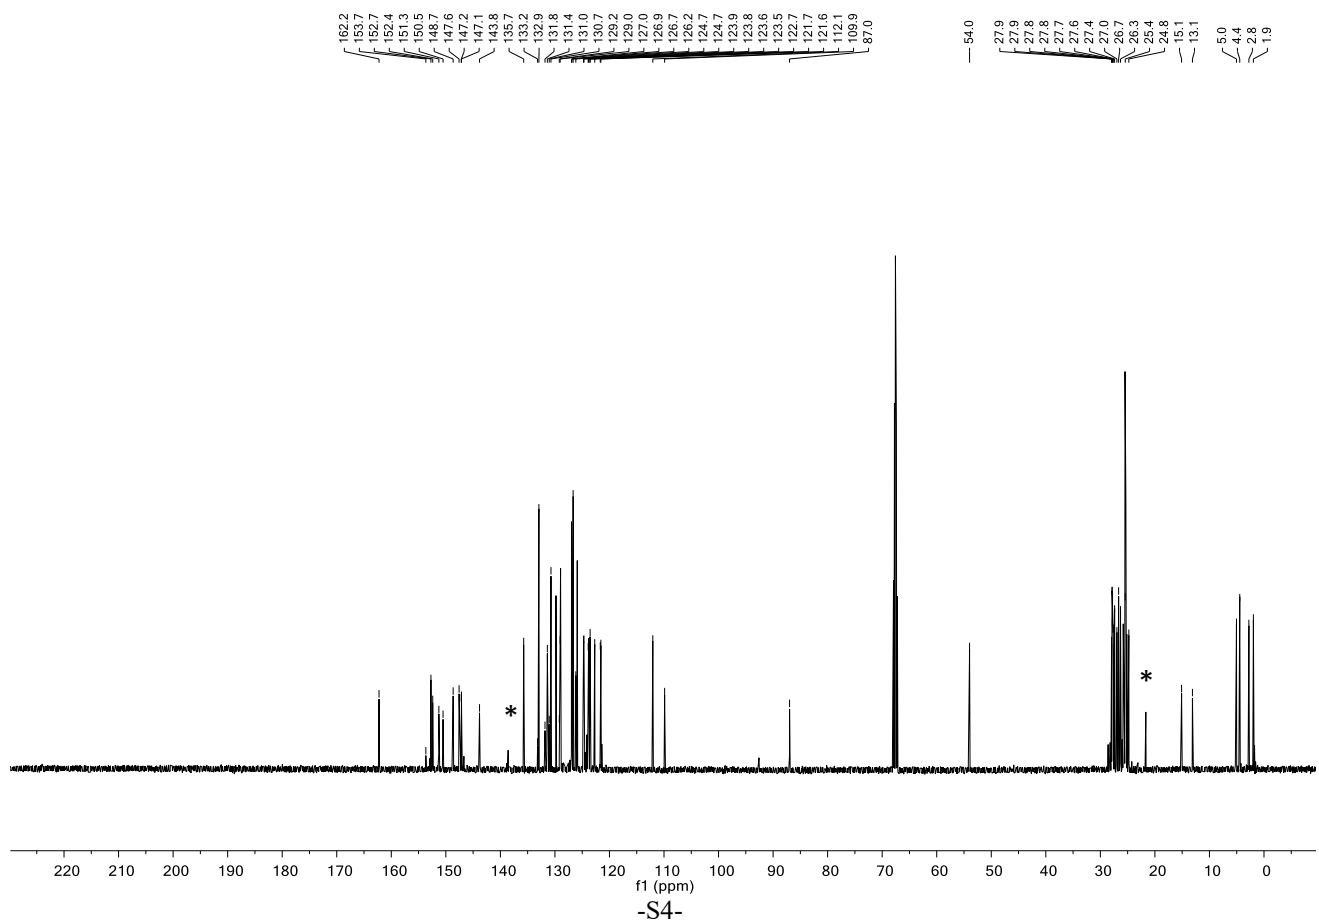

Figure S3.  $^1\text{H}$ - $^1\text{H}$  COSY spectrum of **11**.

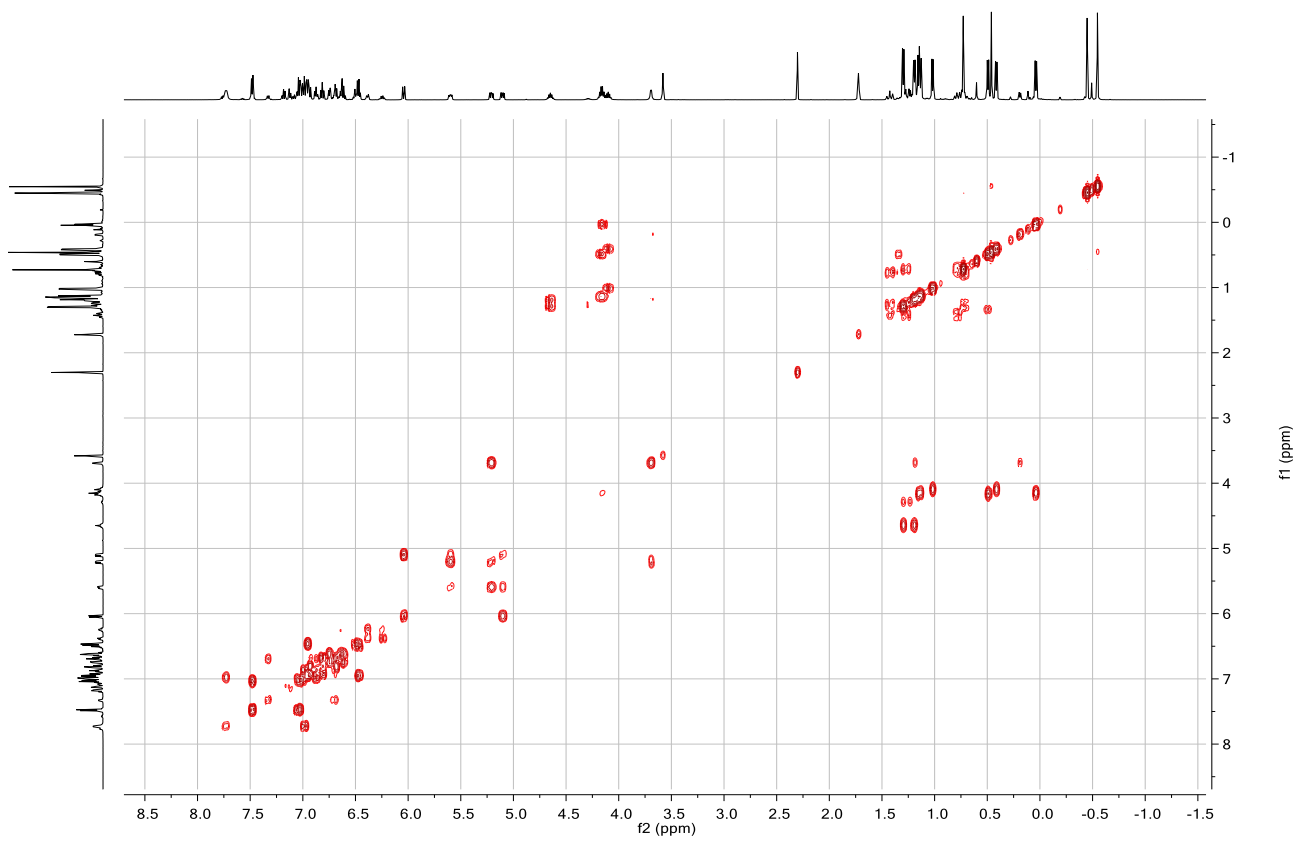

Figure S4.  $^1\text{H}$ - $^{13}\text{C}$  HSQC spectrum of **11**.

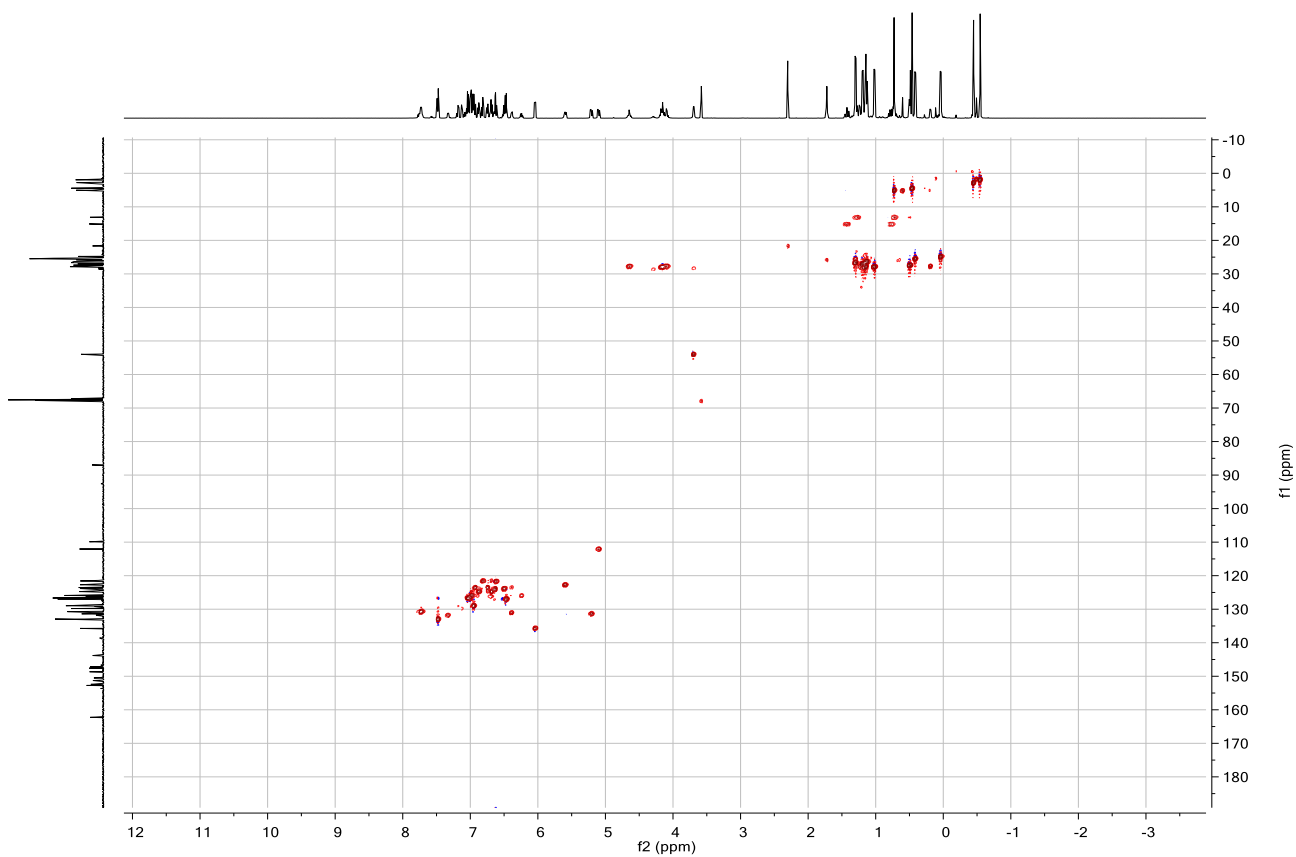

Figure S5.  $^1\text{H}$ - $^{13}\text{C}$  HMBC spectrum of **11**.

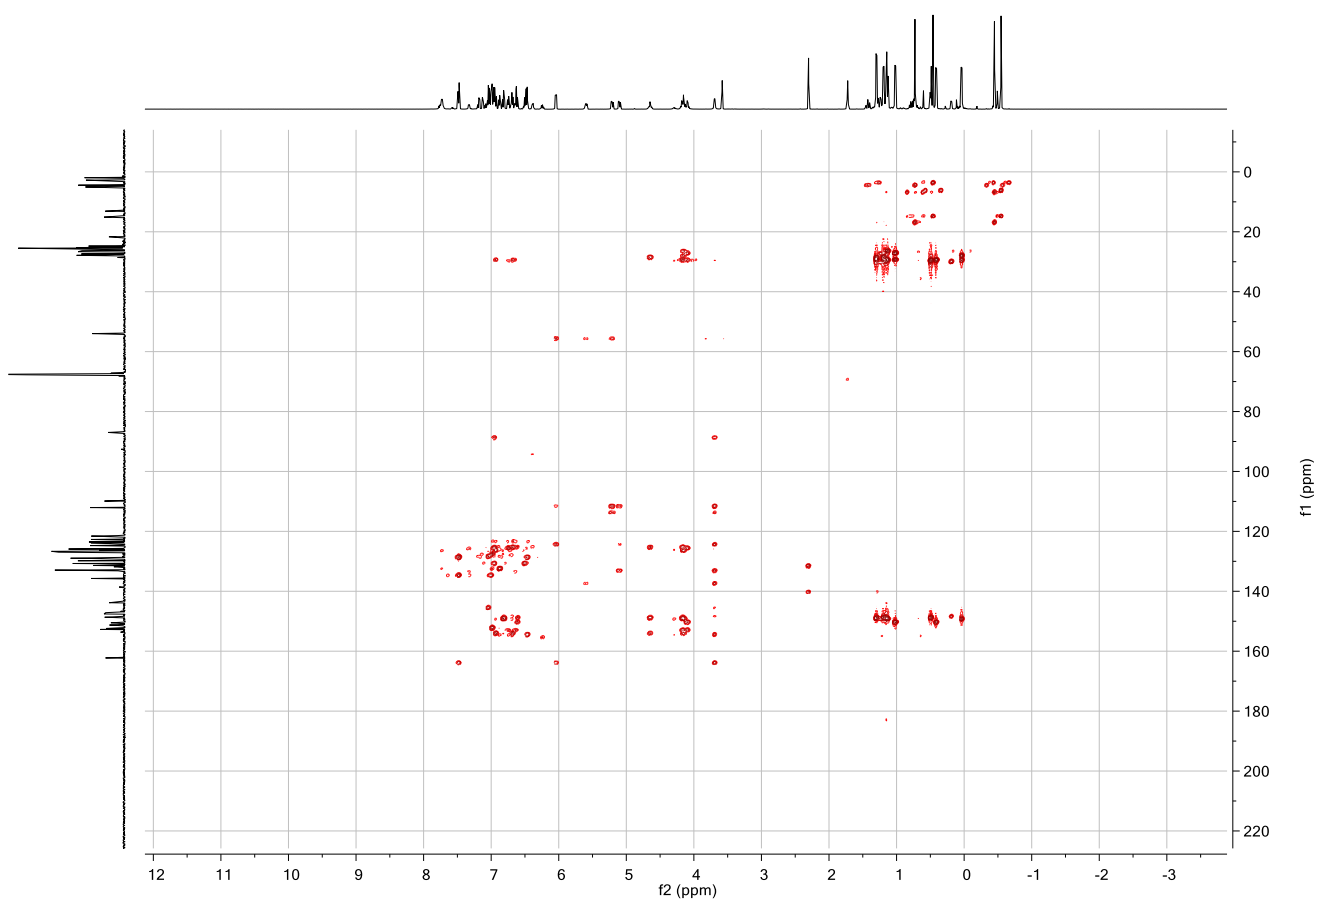

*Synthesis of  $K[\{\text{SiN}^{\text{Dipp}}\}\text{Al-}\kappa^2\text{-O,O'-(OCPHMe)}_2]$  (**12**)*

In a J Young's tube,  $[\{\text{SiN}^{\text{Dipp}}\}\text{AlK}]_2$  (**8**, 28 mg, 0.025mmol) was dissolved in 0.4 mL of  $d^6$ -benzene before the addition of acetophenone (11.5 $\mu$ L, 11.8mg, 0.10 mmol) *via* a micropipette. The resulting pale yellow reaction mixture was kept at 60 °C overnight to afford a colourless solution with colourless crystals. A single crystal suitable for X-ray crystallography was picked from the crystalline solid. The remaining colourless solids were then collected, washed with hexane (0.5mL x 2), and dried under vacuum to give **12** as a colourless powder. Yield 29 mg, 72%. Synthesis was also conducted in toluene with the same result. Yield 30 mg, 74%. Anal. Calcd. For  $\text{C}_{53}\text{H}_{74}\text{AlKN}_2\text{Si}_2\text{O}_2$  (**12**. $\text{C}_7\text{H}_8$ ) C, 71.25; H, 8.35; N, 3.14 %. Found: C, 70.72; H, 8.25, N, 2.86 %. The powder was dissolved in THF- $d_8$  for NMR characterisation.  $^1\text{H}$  NMR (500 MHz, 298K, THF- $d_8$ )  $\delta$  7.85 – 7.15 (m, 2H, ArH of AlOCPH), 7.11 – 6.93 ( $d_{\text{app}}$ , 4H, *m*- $\text{C}_6\text{H}_3$ ), 6.92-6.77 (m, 8H, ArH of AlOCPH), 6.77-6.68 ( $t_{\text{app}}$ , 2H, *p*- $\text{C}_6\text{H}_3$ ), 4.19 (m, 4H, CHMe<sub>2</sub>), 1.32 – 1.20 (m, 3H, AlOCMePh), 1.16 (d, J = 6.9 Hz, 6H, CHMe<sub>2</sub>), 1.13 (d, J = 6.9 Hz, 6H, CHMe<sub>2</sub>), 1.08 (d, J = 6.9 Hz, 6H, CHMe<sub>2</sub>), 1.06-0.98 (m, 3H, AlOCMePh), 0.96 (s, 4H, SiCH<sub>2</sub>), 0.86 (d, J = 6.9 Hz, 6H CHMe<sub>2</sub>), 0.03 (s, 6H, SiMe<sub>2</sub>), -0.04 (s, 6H, SiMe<sub>2</sub>).  $^{13}\text{C}\{^1\text{H}\}$  NMR (126 MHz, 298K, THF- $d_8$ )  $\delta$  163.0 (ArC of AlOCMePh), 160.6 (ArC of AlOCMePh), 150.5 (ArC of AlOCMePh), 148.7 (*i*- $\text{C}_6\text{H}_3$ ), 147.9 (ArC of AlOCMePh), 143.6 (*o*- $\text{C}_6\text{H}_3$ ), 127.3 (ArC of AlOCMePh), 126.9 (ArC of AlOCMePh), 125.9 (*m*- $\text{C}_6\text{H}_3$ ), 123.4 (ArC of AlOCMePh), 123.3 (ArC of AlOCMePh), 121.5 (*p*- $\text{C}_6\text{H}_3$ ), 83.8 (AlOC), 28.0 (CHMe<sub>2</sub>), 28.0 (CHMe<sub>2</sub>), 26.7 (AlOCMePh), 26.1 (AlOCMePh), 25.8 (CHMe<sub>2</sub>), 25.6 (CHMe<sub>2</sub>), 24.2 (CHMe<sub>2</sub>), 23.7 (CHMe<sub>2</sub>), 15.9 (SiCH<sub>2</sub>), 1.9 (SiMe<sub>2</sub>), 1.6 (SiMe<sub>2</sub>).

**Figure S6.**  $^1\text{H}$  NMR (500MHz, 298 K,  $d_8$ -THF) spectrum of **12**. \*unidentified impurities, plausibly THF coordinated species

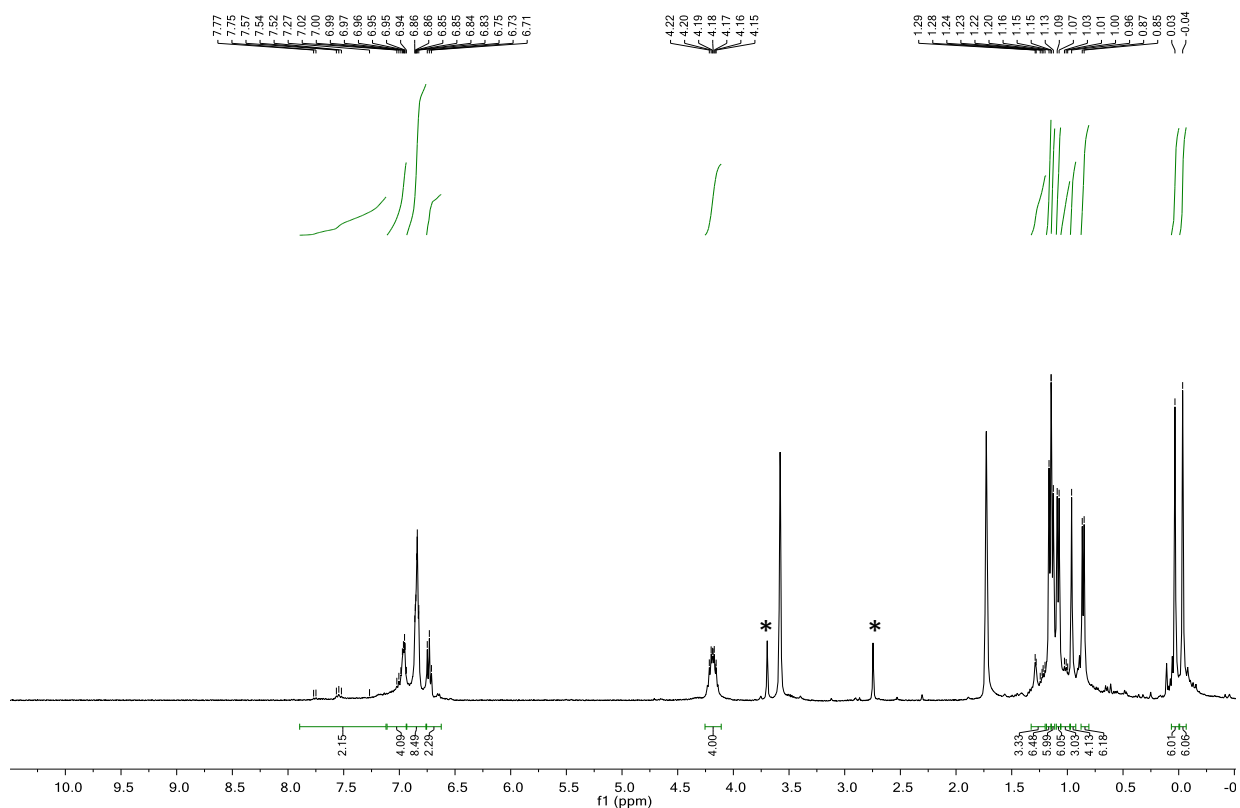

**Figure S7.**  $^{13}\text{C}\{^1\text{H}\}$  NMR (126MHz, 298 K,  $d_8$ -THF) spectrum of **12**.

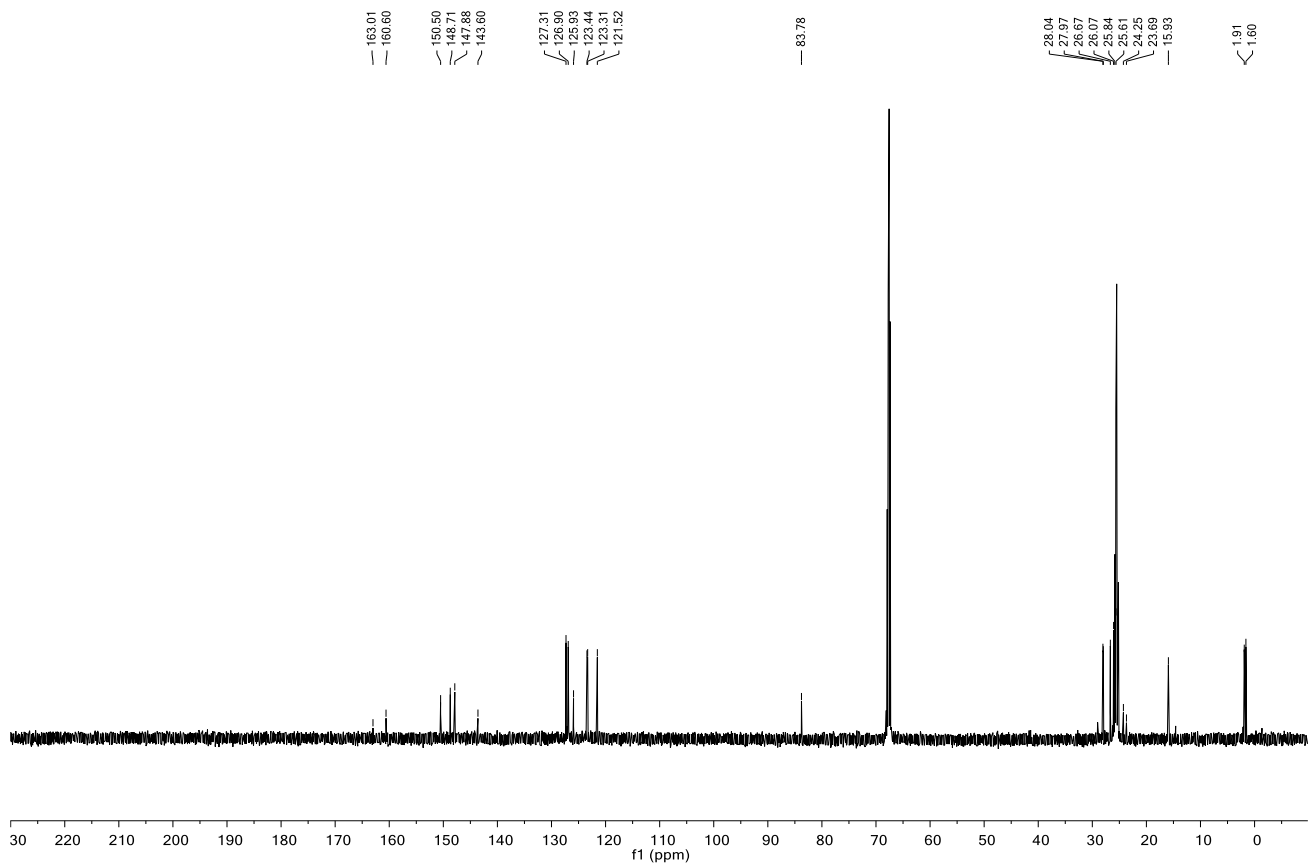



Figure S8.  $^1\text{H}$ - $^{13}\text{C}$  HSQC spectrum of **12**.

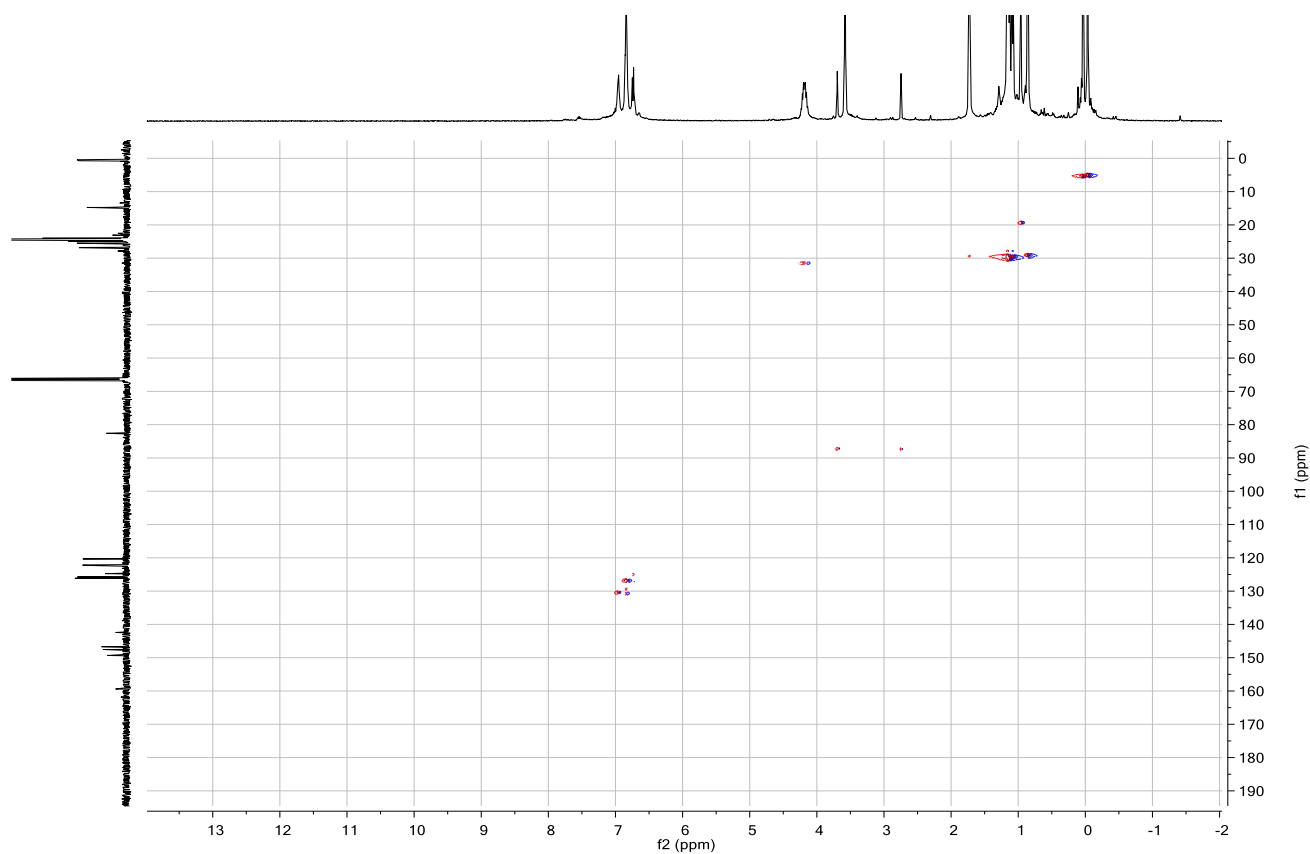

Figure S9.  $^1\text{H}$ - $^{13}\text{C}$  HMBC spectrum of **12**.

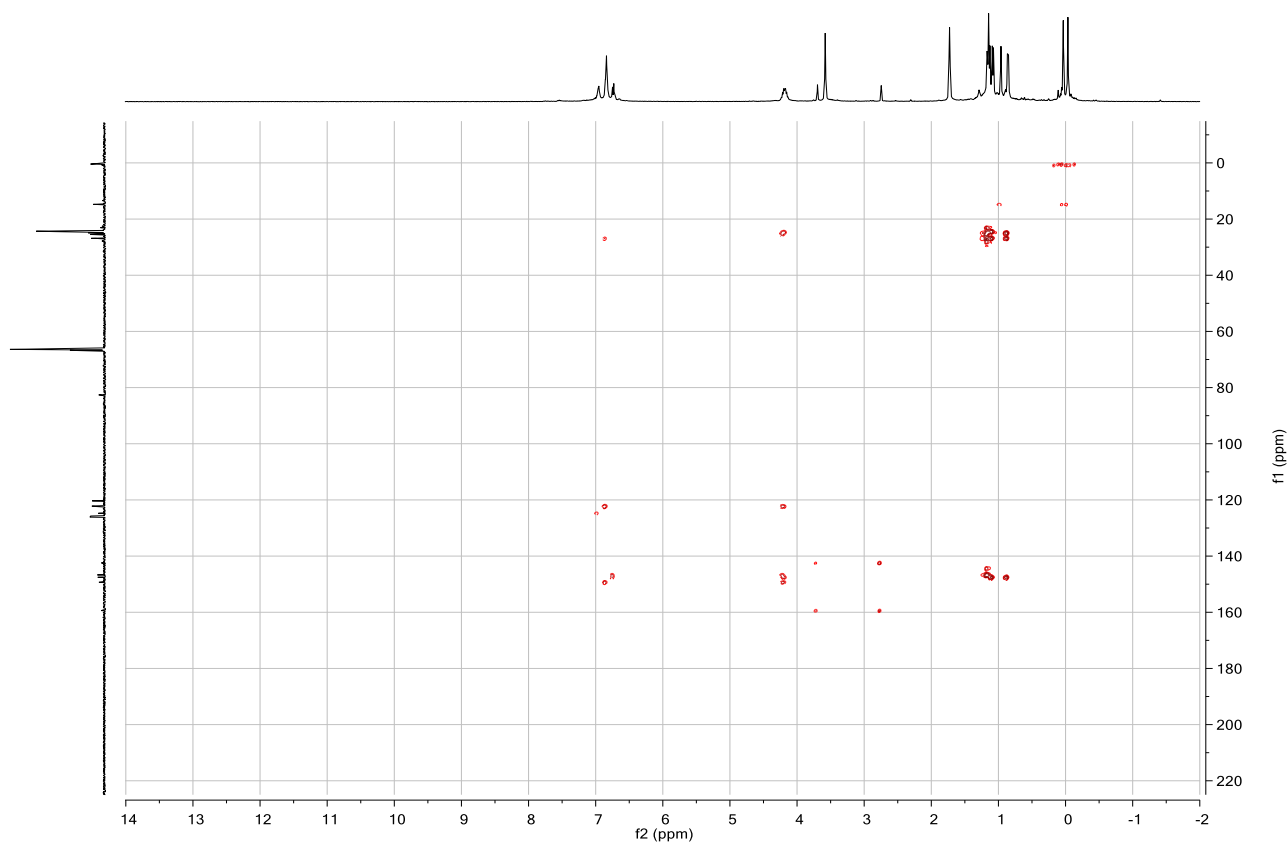

*Synthesis of  $K[\{\text{SiN}^{\text{Dipp}}\}\text{Al}(\text{H})\text{OC}(\text{iPr})=\text{CMe}_2]$  (**13**)*

In a J Young's tube, [ $\{\text{SiN}^{\text{Dipp}}\}\text{AlK}$ ]<sub>2</sub> (**8**, 28 mg, 0.025mmol) was dissolved in 0.4 mL of toluene before the addition of 2,4-dimethyl-3-pentanone (7.1  $\mu\text{L}$ , 5.7mg, 0.05 mmol) *via* a micropipette. The resulting bright yellow reaction mixture was kept at 60 °C overnight to afford a colourless solution with colourless crystals. A single crystal suitable for X-ray crystallography was picked from the crystalline solid. The remaining colourless solids were then collected, washed with hexane (0.5mL x 2), and dried under vacuum to give **13** as a colourless powder. Yield 30 mg, 89%. Anal. Calcd. For  $\text{C}_{37}\text{H}_{64}\text{AlKN}_2\text{Si}_2\text{O}$  (**13**) C, 65.82; H, 9.55; N, 4.15 %. Found: C, 64.76; H, 8.93, N, 3.92 %. <sup>1</sup>H NMR (500 MHz, 298K, THF-d<sub>8</sub>)  $\delta$  6.81 (d, J = 7.5 Hz, 4H, *m*-C<sub>6</sub>H<sub>3</sub>), 6.65 (t, J = 7.5 Hz, 2H, *p*-C<sub>6</sub>H<sub>3</sub>), 4.26 (sept, J = 6.5 Hz, 2H, CHMe<sub>2</sub> on N<sup>Dipp</sup>), 4.20 (sept, J = 6.5 Hz, 2H, CHMe<sub>2</sub> on N<sup>Dipp</sup>), 1.82 (sept, J = 7.2 Hz, 1H, OCCHMe<sub>2</sub>), 1.33 (s<sup>app</sup>, 6H, OCCMe<sub>2</sub>), 1.17-1.14 (m, 12H, CHMe<sub>2</sub> on N<sup>Dipp</sup>), 1.13 (d, J = 6.5 Hz, 6H, CHMe<sub>2</sub> on N<sup>Dipp</sup>), 1.06 (d, J = 6.5 Hz, 6H, CHMe<sub>2</sub> on N<sup>Dipp</sup>), 0.89 (s, br, 4H, SiCH<sub>2</sub>), 0.40 (d, J = 7.2 Hz, 6H, OCCHMe<sub>2</sub>), -0.05 (s, 6H, SiMe<sub>2</sub>), -0.09 (s, 6H, SiMe<sub>2</sub>). <sup>1</sup>H resonance correlated to AlH was not observed. <sup>13</sup>C {<sup>1</sup>H} NMR (126 MHz, 298K, THF-d<sub>8</sub>)  $\delta$  155.7 (OC), 151.5 (*i*-C<sub>6</sub>H<sub>3</sub>), 148.8 (*o*-C<sub>6</sub>H<sub>3</sub>), 147.9 (*o*-C<sub>6</sub>H<sub>3</sub>), 123.3 (*m*-C<sub>6</sub>H<sub>3</sub>), 123.2 (*m*-C<sub>6</sub>H<sub>3</sub>), 121.2 (*p*-C<sub>6</sub>H<sub>3</sub>), 94.7 (OCCMe<sub>2</sub>), 35.4 (OCCHMe<sub>2</sub>), 29.0 (CHMe<sub>2</sub> on N<sup>Dipp</sup>), 27.9 (CHMe<sub>2</sub> on N<sup>Dipp</sup>), 27.8 (CHMe<sub>2</sub> on N<sup>Dipp</sup>), 26.4 (CHMe<sub>2</sub> on N<sup>Dipp</sup>), 26.0 (CHMe<sub>2</sub> on N<sup>Dipp</sup>), 24.2 (CHMe<sub>2</sub> on N<sup>Dipp</sup>), 21.2 (OCCHMe<sub>2</sub>), 20.5 (OCCMe<sub>2</sub>), 19.4 (OCCMe<sub>2</sub>), 16.2 (SiCH<sub>2</sub>), 2.4 (SiMe<sub>2</sub>), -1.4 (SiMe<sub>2</sub>).

**Figure S10.**  $^1\text{H}$  NMR (500 MHz, 298 K, THF- $d_8$ ) spectrum of **13**. \*silicone grease

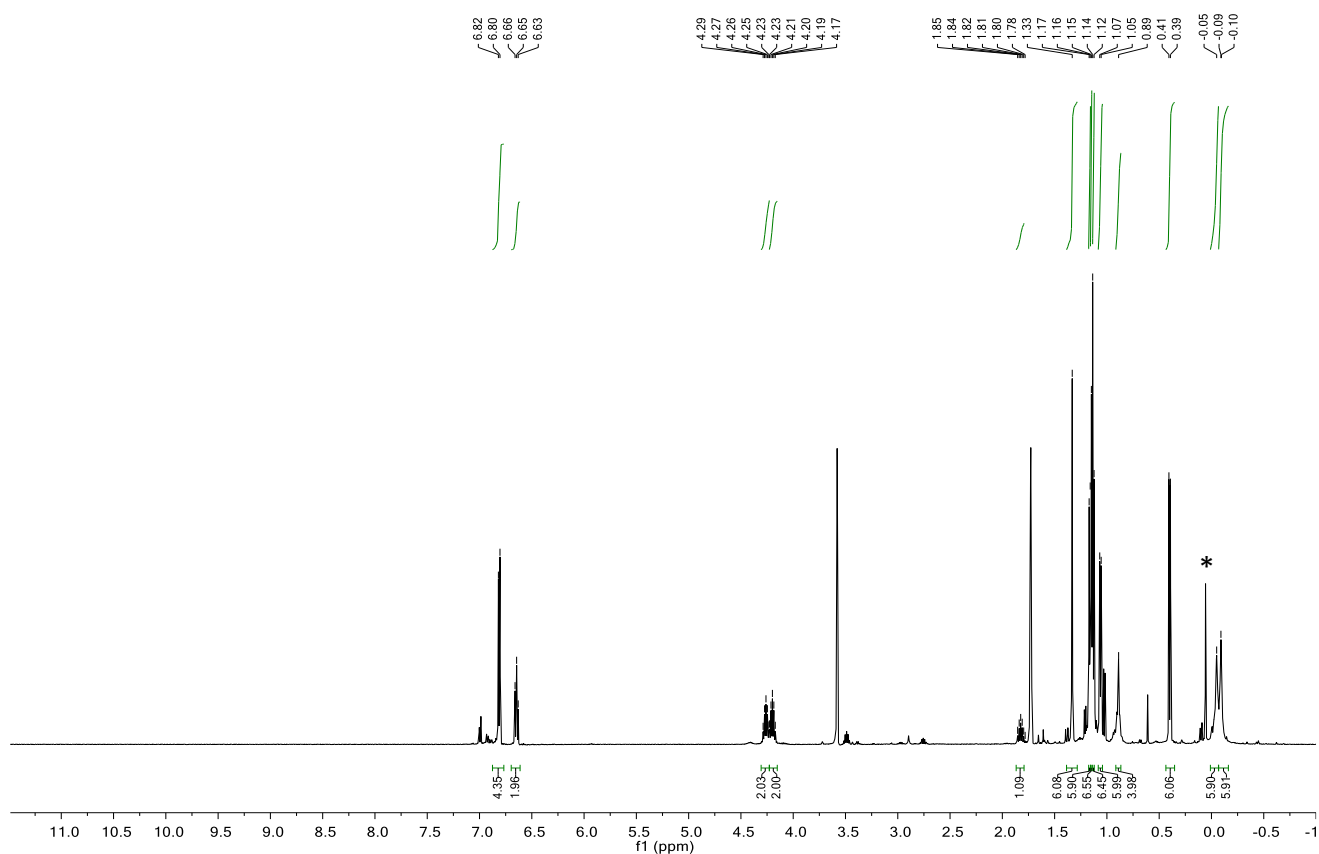

**Figure S11.**  $^{13}\text{C}\{^1\text{H}\}$  NMR (126 MHz, 298 K, THF- $d_8$ ) spectrum of **13**. \*silicone grease

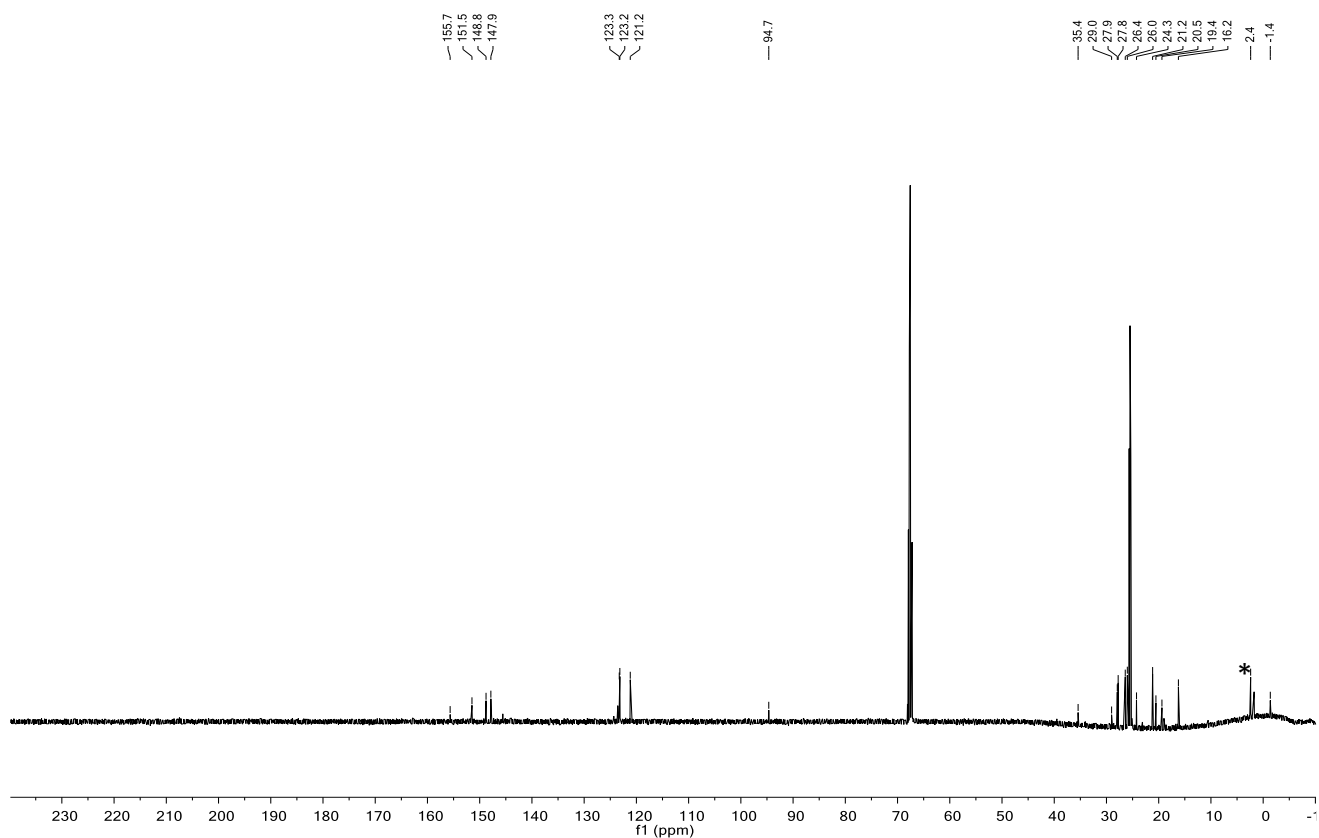

Figure S12.  $^1\text{H}$ - $^1\text{H}$  COSY spectrum of **13**.

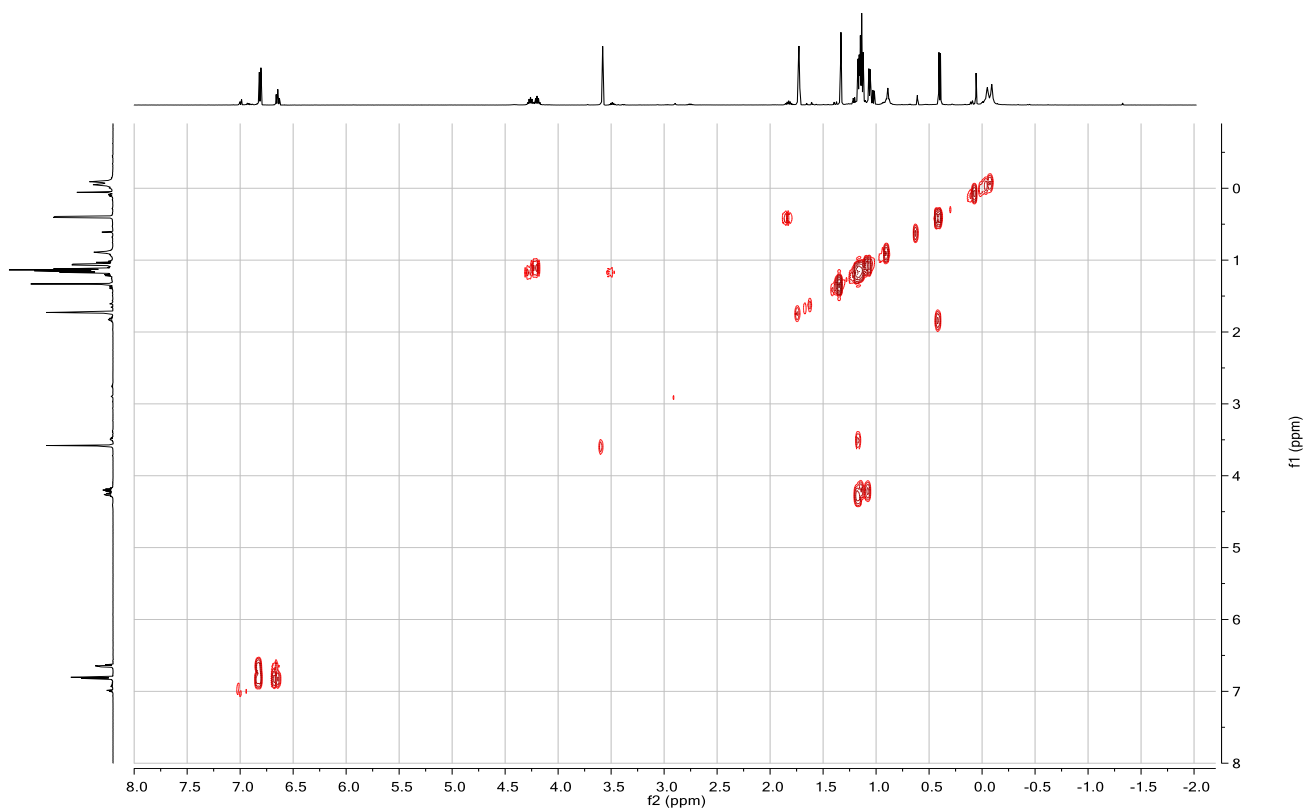

Figure S13.  $^1\text{H}$ - $^{13}\text{C}$  HSQC spectrum of **13**.

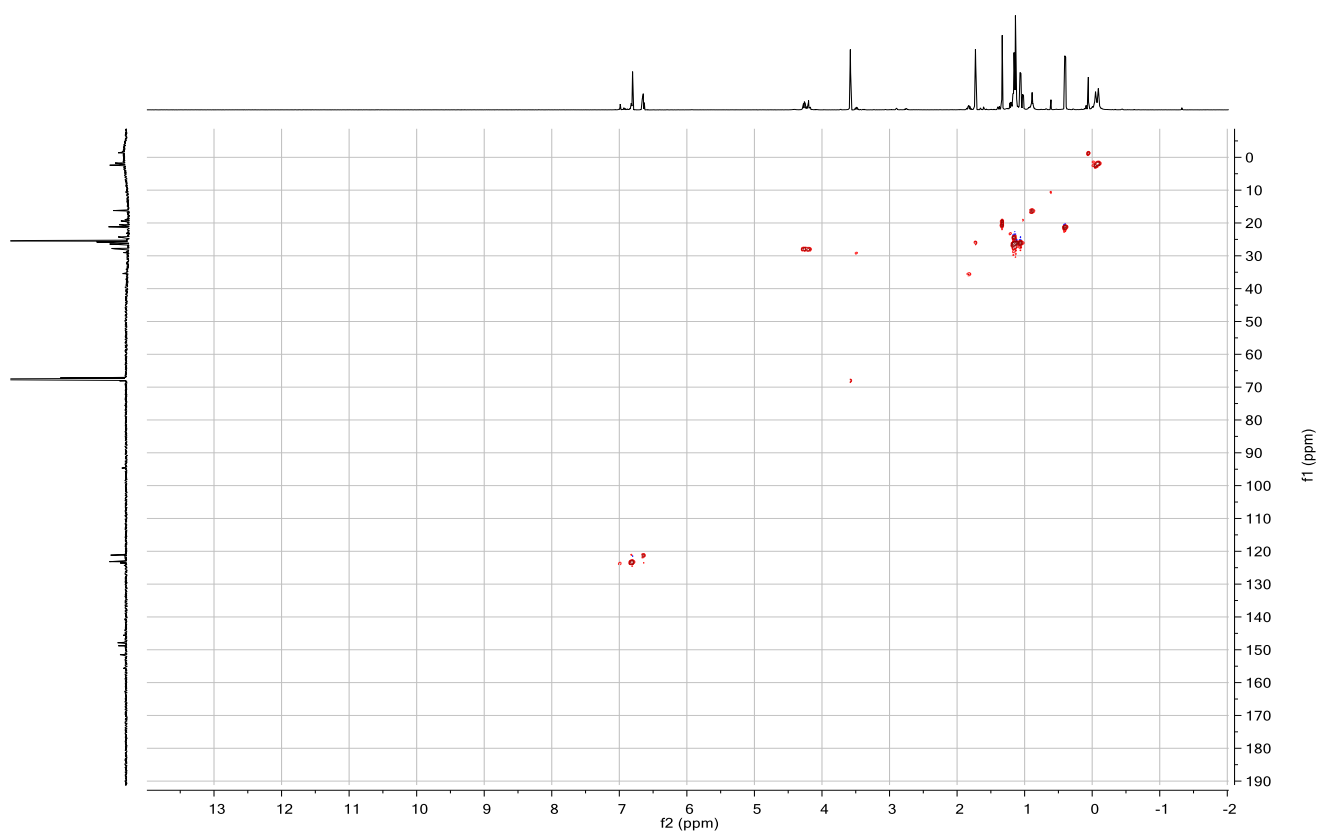

Figure S14.  $^1\text{H}$ - $^{13}\text{C}$  HMBC spectrum of **13**.

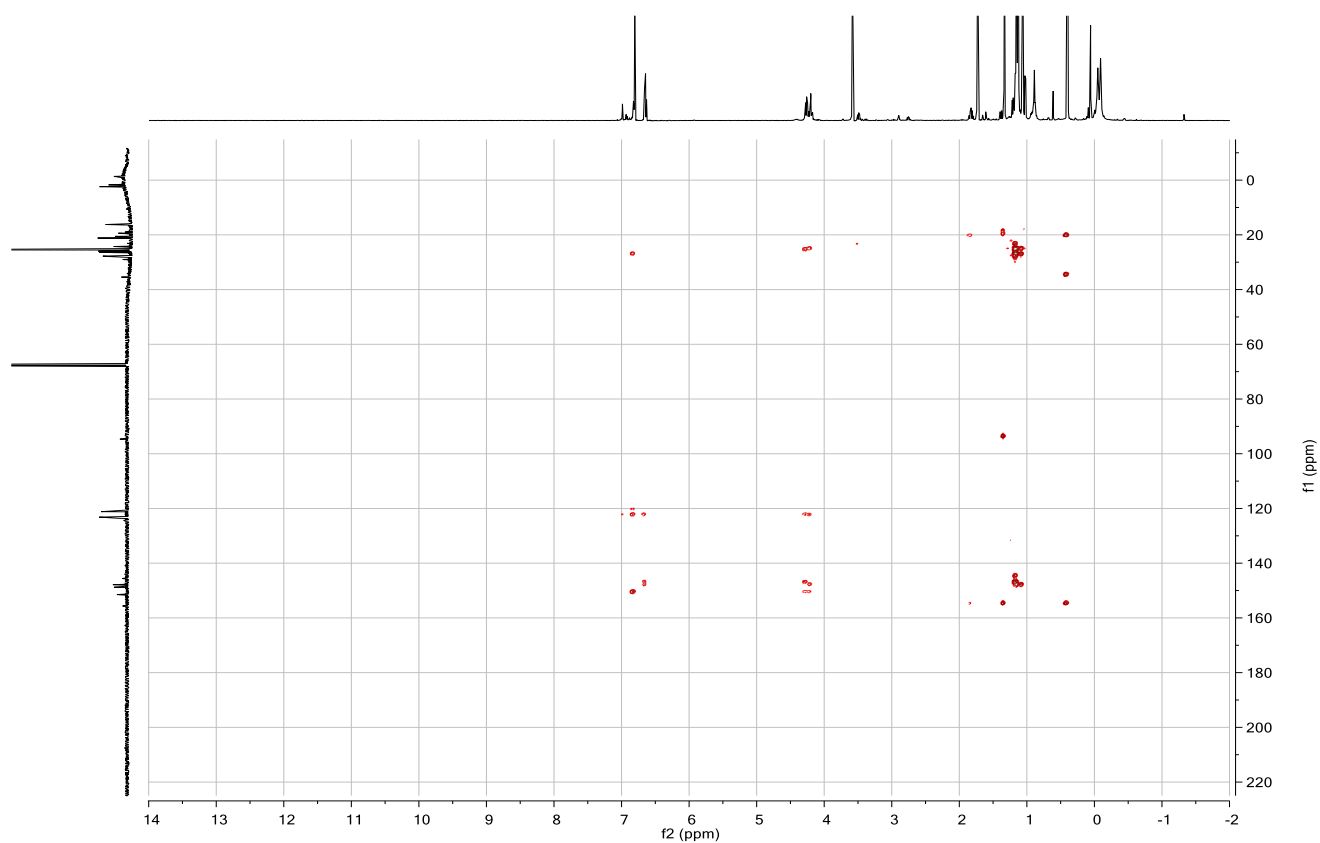

*Synthesis of 14; Reaction of [ $\{\text{SiN}^{\text{Dipp}}\}\text{AlK}\}_2$  (**8**) with 2,2,4,4-tetramethylpentanone*

In a J Young's tube, [ $\{\text{SiN}^{\text{Dipp}}\}\text{AlK}\}_2$  (**8**, 28 mg, 0.025mmol) was dissolved in 0.4 mL of toluene before the addition of 2,4-dimethyl-3-pentanone (8.6  $\mu\text{L}$ , 7.1mg, 0.05 mmol) *via* a micropipette. The resulting bright yellow reaction mixture was kept at 60 °C overnight to afford a colourless solution with colourless crystals. A single crystal suitable for X-ray crystallography was picked from the crystalline solid. The colourless solids were then collected, washed with hexane (0.5mL x 2), and dried under vacuum to give **14** as a colourless powder. Yield 28 mg, 83%. Anal. Calcd. For  $\text{C}_{39}\text{H}_{68}\text{AlKN}_2\text{Si}_2\text{O}$  (**14**) C, 66.01; H, 9.73; N, 3.98 %. Found: C, 65.97; H, 9.76, N, 3.74 %. NMR characterisation was performed with a mixture of diastereomers of compound **14**.  $^1\text{H}$  NMR (500 MHz, 298K, THF- $d_8$ )  $\delta$  6.83 – 6.74 (m, 5H, ArH), 6.69 – 6.67 (m, 1H, ArH), 6.64 – 6.55 (m, 4H, , ArH), 6.48– 6.46 (m, 1H, ArH), 6.15 (t,  $J = 7.3$  Hz,  $p\text{-C}_6\text{H}_3$ ), 4.30 (sept,  $J = 6.8$  Hz, 1H, CHMe<sub>2</sub>), 4.18 (sept,  $J = 6.8$  Hz, 1H, CHMe<sub>2</sub>), 4.05 (sept,  $J = 6.8$  Hz, 1H, CHMe<sub>2</sub>), 3.97 (sept,  $J = 6.8$  Hz, 2H, CHMe<sub>2</sub>), 3.77 (sept,  $J = 6.8$  Hz, 1H, CHMe<sub>2</sub>), 3.63 (s, 1H, AlOCH), 3.19 (br, 1H, CHCH<sub>2</sub>Al), 2.75 (s, 1H, AlOCH), 2.16 (t,  $J = 14.3$  Hz, 1H, CHCH<sub>2</sub>Al), 1.33 – 1.31 (m, 6H, CHMe<sub>2</sub>), 1.28 (d,  $J = 6.8$  Hz, 3H, CHMe<sub>2</sub>), 1.25 (d,  $J = 6.8$  Hz, 3H, CHMe<sub>2</sub>), 1.21 (br, 2H, CHCH<sub>2</sub>Al), 1.20 – 1.18 (m, 9H, CHMe<sub>2</sub>), 1.17 (s br, 9H, CMe<sub>3</sub>), 1.16 – 1.10 (m, 6H, CHMe<sub>2</sub>), 1.10 (d,  $J = 6.8$  Hz, 3H, CHMe<sub>2</sub>), 1.07 (d,  $J = 6.7$  Hz, 6H, CHMe<sub>2</sub>), 1.04 (d,  $J = 6.8$  Hz, 3H, CHMe<sub>2</sub>), 1.02 – 1.00 (m, 2H, CHCH<sub>2</sub>Al), 0.97 (s br, 9H, CMe<sub>3</sub>), 0.91 – 0.59 (m, 8H, SiCH<sub>2</sub>), 0.49 (s br, 9H, CMe<sub>3</sub>), 0.45 (s, 3H, SiMe<sub>2</sub>), 0.39 (s br, 9H, CMe<sub>3</sub>), 0.36 (s, 3H, SiMe<sub>2</sub>), 0.33 (s, 3H, SiMe<sub>2</sub>), 0.29 (s, 3H, SiMe<sub>2</sub>), 0.11 (s, 3H, SiMe<sub>2</sub>), -0.45 (s, 3H, SiMe<sub>2</sub>), -0.56 (s, 6H, SiMe<sub>2</sub>).  $^{13}\text{C}$  NMR (126 MHz, 298K, THF- $d_8$ )  $\delta$  153.7 ( $4^\circ$  ArC), 153.7 ( $4^\circ$  ArC), 153.3 ( $4^\circ$  ArC), 152.8 ( $4^\circ$  ArC), 152.5 ( $4^\circ$  ArC), 152.2 ( $4^\circ$  ArC), 151.3 ( $4^\circ$  ArC), 150.0 ( $4^\circ$  ArC), 148.3 ( $4^\circ$  ArC), 148.0 ( $4^\circ$  ArC), 147.7 ( $4^\circ$  ArC), 145.4 ( $4^\circ$  ArC), 123.7 (ArCH), 123.6 (ArCH), 123.4 (ArCH), 123.1 (ArCH), 122.9 (ArCH), 122.7 (ArCH), 122.0 (ArCH), 121.4 (ArCH), 121.3 (ArCH), 121.1 (ArCH), 120.7 (ArCH), 119.7 (ArCH), 87.2 (AlOCH), 84.0 (AlOCH), 39.5 (CMe<sub>3</sub>), 39.2 (CMe<sub>3</sub>), 38.9 (CMe<sub>3</sub>), 38.5 (CMe<sub>3</sub>), 36.8 (CHCH<sub>2</sub>Al), 34.6 (CHCH<sub>2</sub>Al), 32.1 (AlCHCH<sub>2</sub>), 31.4 (CMe<sub>3</sub>), 31.4 (CMe<sub>3</sub>), 31.3 (CMe<sub>3</sub>), 30.8 (CMe<sub>3</sub>), 29.9 (AlCHCH<sub>2</sub>), 29.0 (CHMe<sub>2</sub>), 29.0 (CHMe<sub>2</sub>), 28.4 (CHMe<sub>2</sub>), 28.2 (CHMe<sub>2</sub>), 27.7 (CHMe<sub>2</sub>), 27.6

(CHMe<sub>2</sub>), 27.4 (CHMe<sub>2</sub>), 27.3 (CHMe<sub>2</sub>), 27.3 (CHMe<sub>2</sub>), 27.1 (CHMe<sub>2</sub>), 27.1 (CHMe<sub>2</sub>), 27.0 (CHMe<sub>2</sub>),  
27.0 (CHMe<sub>2</sub>), 26.9 (CHMe<sub>2</sub>), 26.8 (CHMe<sub>2</sub>), 26.7 (CHMe<sub>2</sub>), 26.7 (CHMe<sub>2</sub>), 26.3 (CHMe<sub>2</sub>), 26.0  
(CHMe<sub>2</sub>), 15.5 (SiCH<sub>2</sub>), 15.4 (SiCH<sub>2</sub>), 15.3 (SiCH<sub>2</sub>), 15.0 (SiCH<sub>2</sub>), 6.1 (SiMe<sub>2</sub>), 4.8 (SiMe<sub>2</sub>), 4.7  
(SiMe<sub>2</sub>), 3.7 (SiMe<sub>2</sub>), 2.1 (SiMe<sub>2</sub>), 1.0 (SiMe<sub>2</sub>), 0.6 (SiMe<sub>2</sub>), -0.6 (SiMe<sub>2</sub>).

**Figure S15.**  $^1\text{H}$  NMR (500 MHz, 298 K, THF- $d_8$ ) spectrum of **14**.

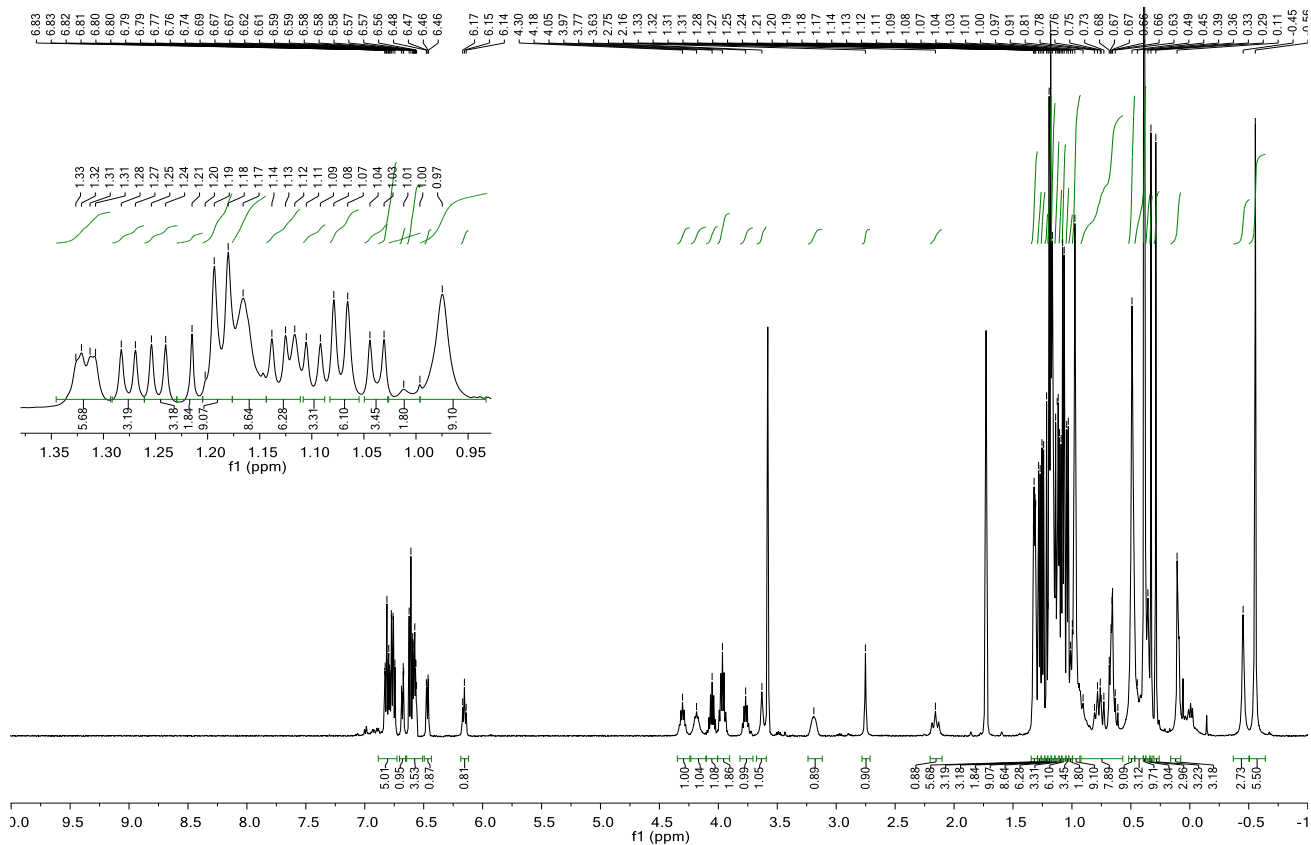

**Figure S16.**  $^{13}\text{C}\{^1\text{H}\}$  NMR (126 MHz, 298 K, THF- $d_8$ ) spectrum of **14**.

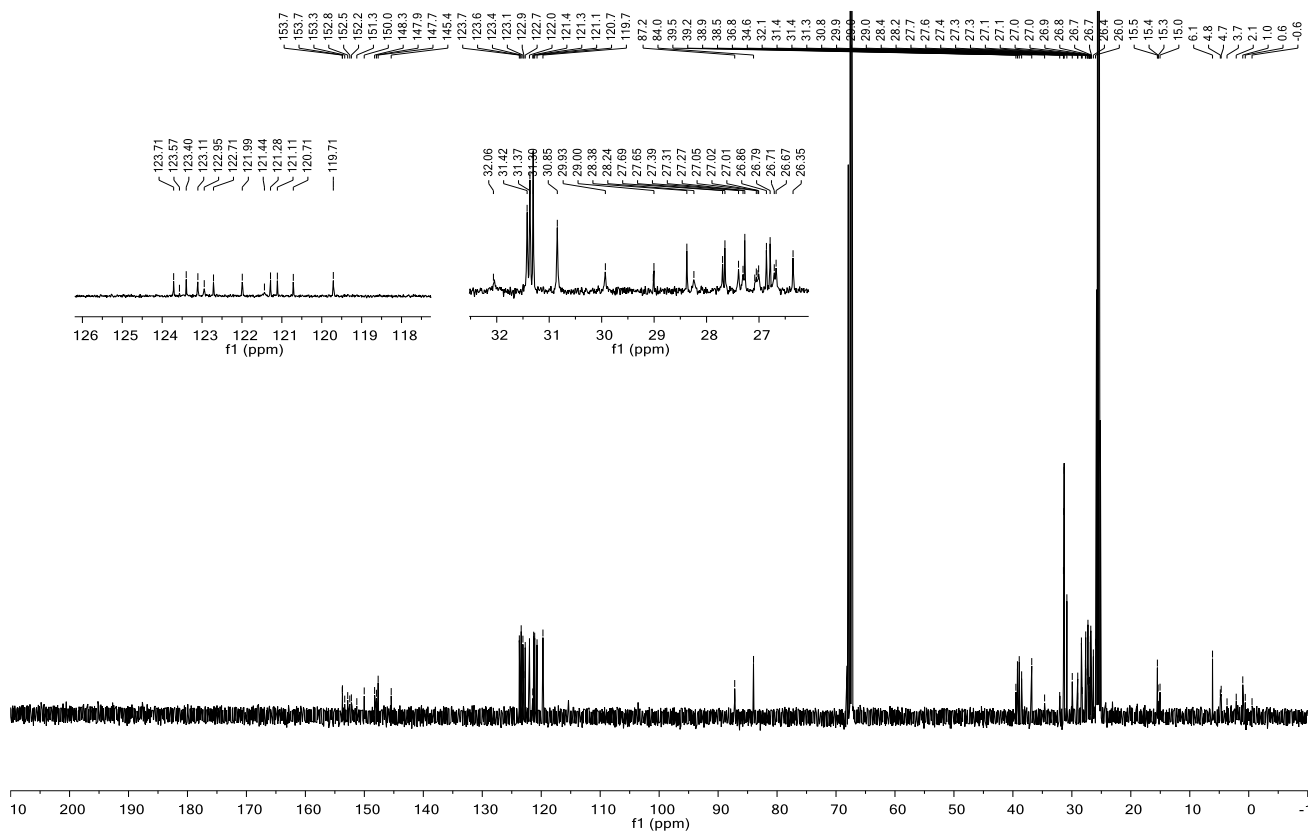



Figure S17.  $^1\text{H}$ - $^1\text{H}$  COSY spectrum of **14**.

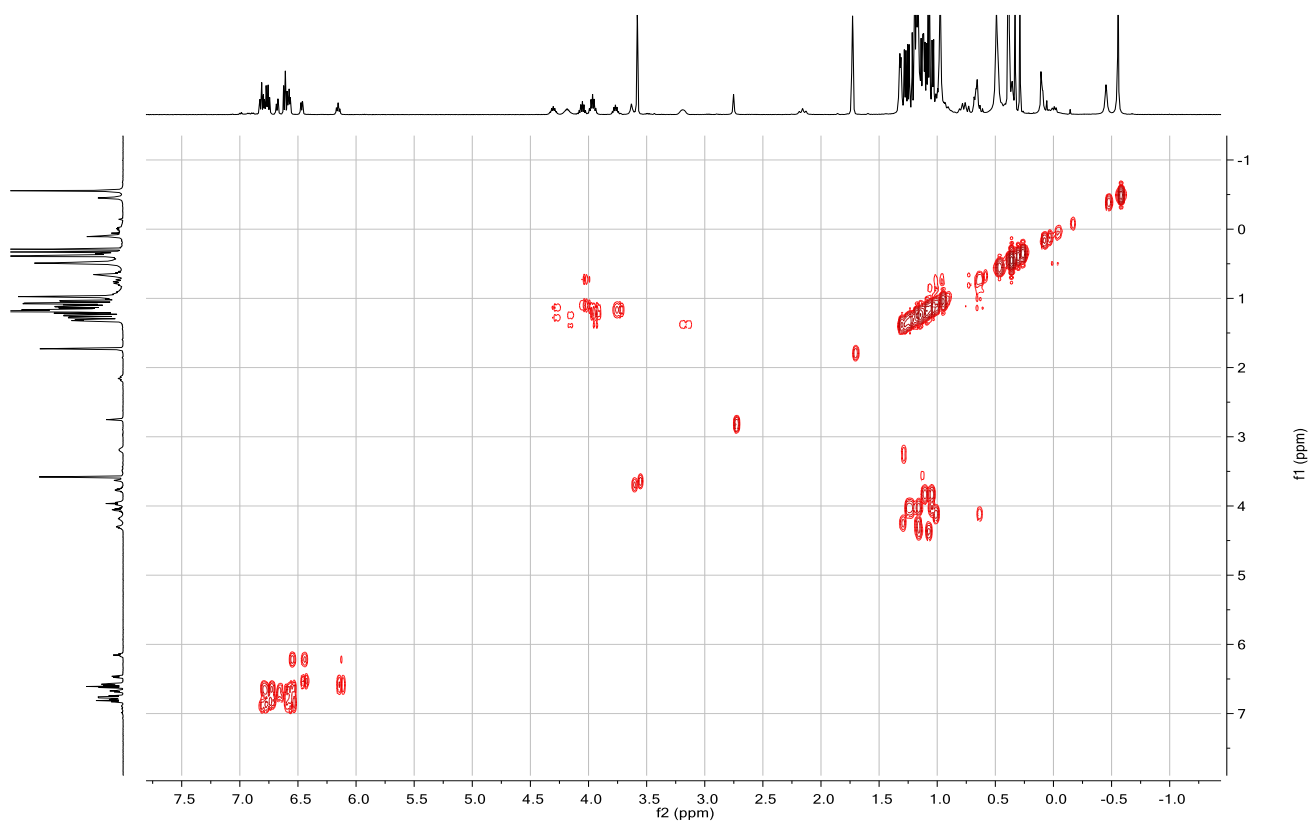

Figure S18.  $^1\text{H}$ - $^{13}\text{C}$  HSQC spectrum of **14**.

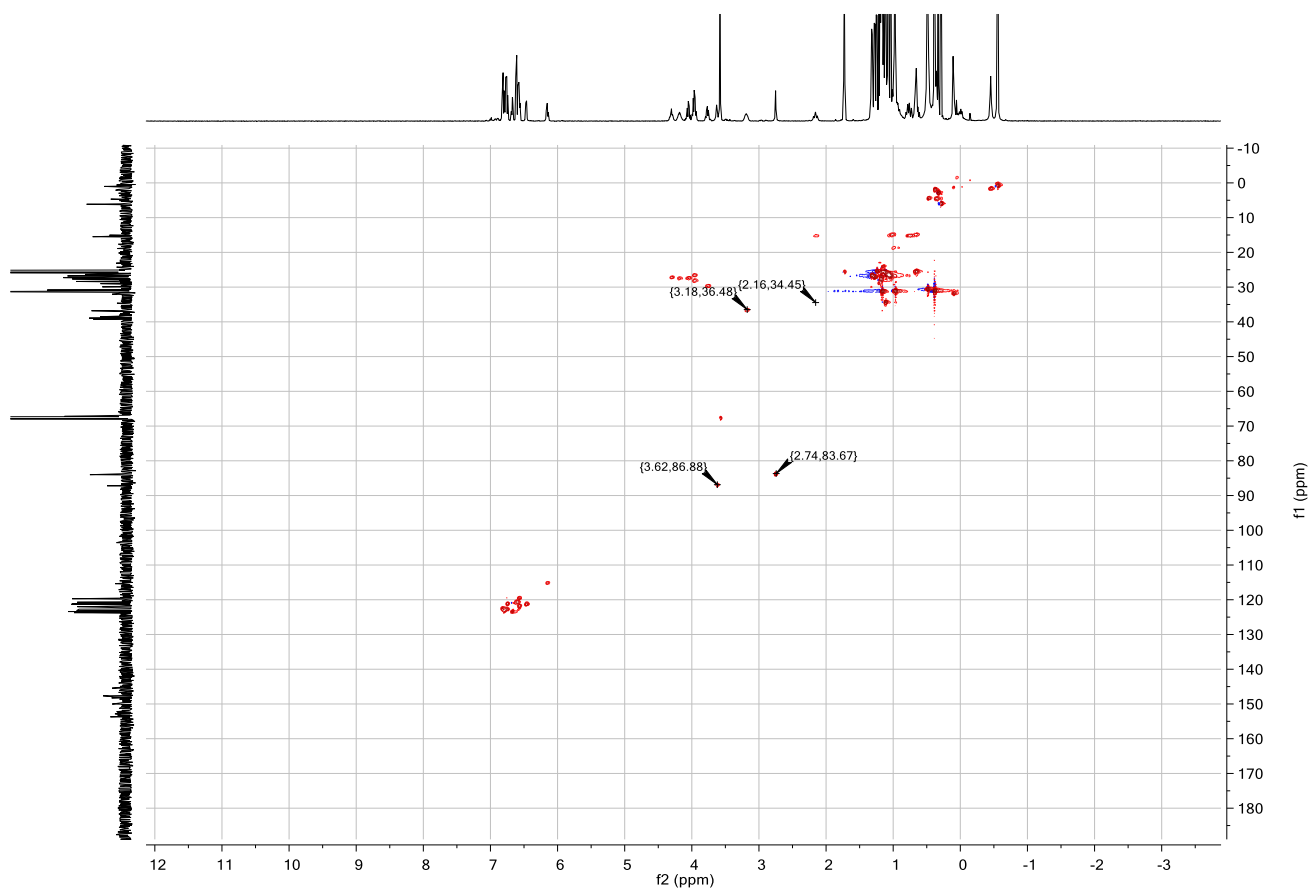

Figure S19.  $^1\text{H}$ - $^{13}\text{C}$  HMBC spectrum of **14**.

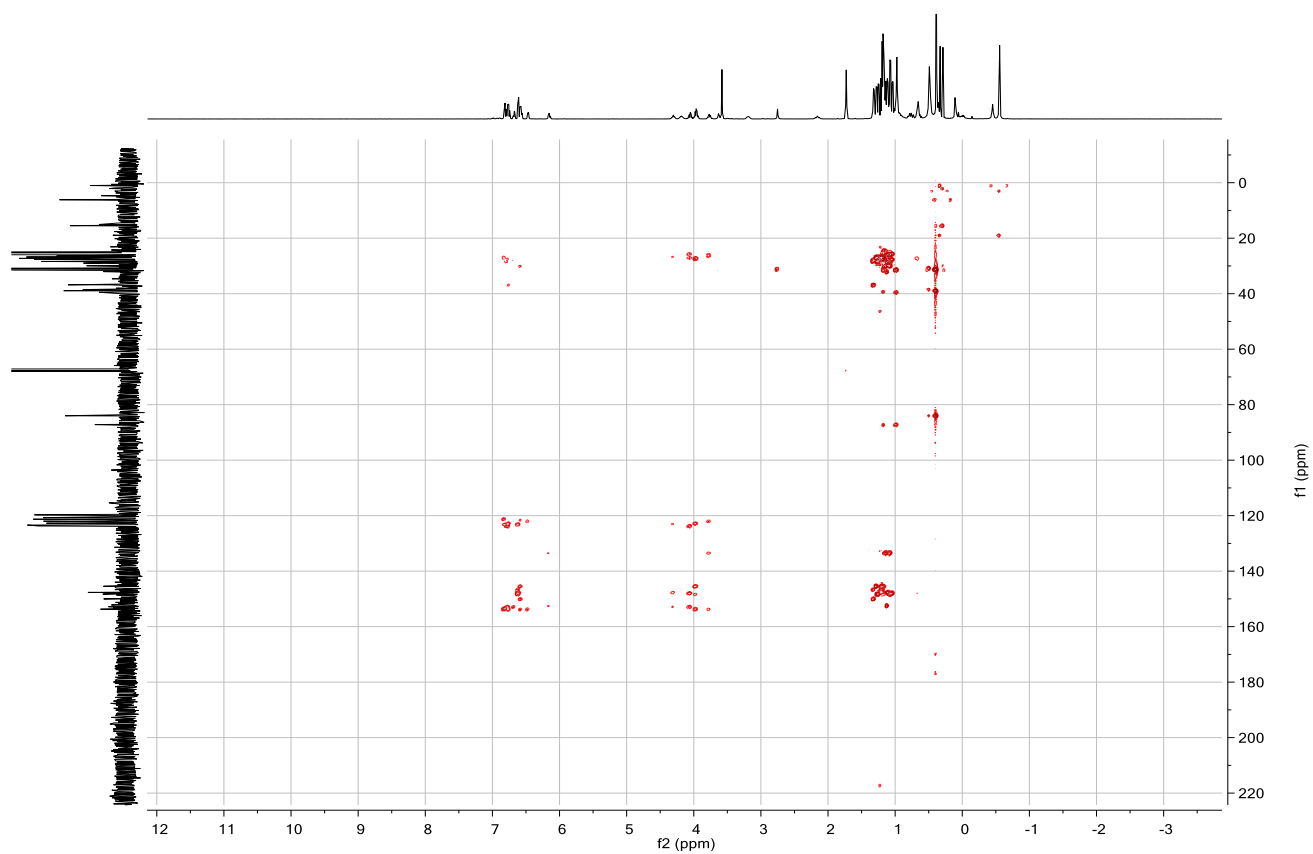

### 1.3. Single Crystal X-ray Diffraction Analysis

Single Crystal X-ray diffraction data for compounds **11** – **14** were collected on a SuperNova, EosS2 diffractometer using CuK $\alpha$  ( $\lambda = 1.54184 \text{ \AA}$ ) radiation throughout. The crystals were maintained at 150 K during data collection. Using Olex2,<sup>2</sup> the structures were solved with the olex2.solve<sup>3</sup> structure solution program or ShelXT and refined with the ShelXL<sup>4</sup> refinement package using Least-Squares minimization.

The asymmetric unit in the structure of **12** is a monomer, which contributes to the formation of 1-D polymers in the gross structure.

Similarly, in **13**, the asymmetric unit also comprises a monomer (which gives rise to 1-D polymers in the gross structure) plus a molecule of benzene with half site-occupancy. The latter straddles a crystallographic inversion centre, which necessarily means that it is disordered with itself. As such, this moiety was refined as a rigid hexagon and with the inclusion of ADP restraints. The hydride in the main feature was located and refined without restraints. A residual electron density maximum, proximate to K1, may indicate a modicum of disorder at this centre. However, efforts to model same did not improve convergence and indicated that, at best, that any alkali metal disorder was < 5%. Given the paucity of evidence for such disorder credibility, partitioning K1 between two sites was abandoned.

The asymmetric unit in the structure of **14** corresponds to one quarter of a tetramer. Disorder prevailed in two regions. In particular, the methyl groups which form part of the tert-butyl functionalities based on C32 and C36 were each treated for an 80:20 site-occupancy split while the Dipp moiety attached to N1 was modelled to take account of a 2-component disorder in a 55:45 ratio. All hydrogens were included at calculated positions, but those attached at C8, C18, C30, C48, C57 and C69 were refined with free  $U_{iso}$  values as a measure of credibility with which to assess any interactions with the potassium centres present. Distance and ADP restraints were employed, on merit, in disordered regions to assist convergence.

**Table S1:** Crystal data and structure refinement for compounds **11** – **14**.

| Compound                                                     | <b>11</b>                                                                        | <b>12</b>                                                                        | <b>13</b>                                                           | <b>13</b>                                                           |
|--------------------------------------------------------------|----------------------------------------------------------------------------------|----------------------------------------------------------------------------------|---------------------------------------------------------------------|---------------------------------------------------------------------|
| Empirical formula                                            | C <sub>64</sub> H <sub>86</sub> AlKN <sub>2</sub> O <sub>4</sub> Si <sub>2</sub> | C <sub>46</sub> H <sub>66</sub> AlKN <sub>2</sub> O <sub>2</sub> Si <sub>2</sub> | C <sub>40</sub> H <sub>67</sub> AlKN <sub>2</sub> OSi <sub>2</sub>  | C <sub>39</sub> H <sub>68</sub> AlKN <sub>2</sub> OSi <sub>2</sub>  |
| Formula weight                                               | 1069.60                                                                          | 801.26                                                                           | 714.21                                                              | 703.21                                                              |
| Crystal system                                               | monoclinic                                                                       | orthorhombic                                                                     | orthorhombic                                                        | monoclinic                                                          |
| Space group                                                  | <i>Cc</i>                                                                        | <i>Pbca</i>                                                                      | <i>Pbcn</i>                                                         | <i>C2/c</i>                                                         |
| <i>a</i> /Å                                                  | 21.7511(4)                                                                       | 22.4043(4)                                                                       | 20.3555(1)                                                          | 44.6873(10)                                                         |
| <i>b</i> /Å                                                  | 13.3392(2)                                                                       | 17.8222(3)                                                                       | 23.0087(1)                                                          | 12.4327(1)                                                          |
| <i>c</i> /Å                                                  | 20.8348(3)                                                                       | 22.5974(5)                                                                       | 18.3408(1)                                                          | 37.5655(8)                                                          |
| $\alpha$ /°                                                  | 90                                                                               | 90                                                                               | 90                                                                  | 90                                                                  |
| $\beta$ /°                                                   | 101.877(2)                                                                       | 90                                                                               | 90                                                                  | 127.202(3)                                                          |
| $\gamma$ /°                                                  | 90                                                                               | 90                                                                               | 90                                                                  | 90                                                                  |
| Volume/Å <sup>3</sup>                                        | 5915.64(17)                                                                      | 9023.0(3)                                                                        | 8589.98(7)                                                          | 16623.8(7)                                                          |
| <i>Z</i>                                                     | 4                                                                                | 8                                                                                | 8                                                                   | 16                                                                  |
| $\rho_{\text{calc}}$ g/cm <sup>3</sup>                       | 1.201                                                                            | 1.180                                                                            | 1.105                                                               | 1.124                                                               |
| $\mu$ /mm <sup>-1</sup>                                      | 1.686                                                                            | 2.012                                                                            | 2.035                                                               | 2.094                                                               |
| <i>F</i> (000)                                               | 2304.0                                                                           | 3456.0                                                                           | 3112.0                                                              | 6144.0                                                              |
| Crystal size/mm <sup>3</sup>                                 | 0.102 × 0.071 × 0.037                                                            | 0.137 × 0.028 × 0.024                                                            | 0.209 × 0.163 × 0.104                                               | 0.112 × 0.068 × 0.057                                               |
| 2 $\theta$ range /°                                          | 7.822 to 144.238                                                                 | 7.448 to 146.122                                                                 | 7.54 to 145.934                                                     | 7.522 to 146.568                                                    |
| Index ranges                                                 | -26 ≤ <i>h</i> ≤ 26,<br>-16 ≤ <i>k</i> ≤ 12,<br>-21 ≤ <i>l</i> ≤ 25              | -27 ≤ <i>h</i> ≤ 24,<br>-18 ≤ <i>k</i> ≤ 21,<br>-27 ≤ <i>l</i> ≤ 27              | -24 ≤ <i>h</i> ≤ 25,<br>-28 ≤ <i>k</i> ≤ 23,<br>-22 ≤ <i>l</i> ≤ 22 | -53 ≤ <i>h</i> ≤ 55,<br>-15 ≤ <i>k</i> ≤ 15,<br>-46 ≤ <i>l</i> ≤ 46 |
| Reflections collected                                        | 15239                                                                            | 30723                                                                            | 112622                                                              | 156548                                                              |
| Independent reflections                                      | 7932, 0.0209                                                                     | 8870, 0.0464                                                                     | 8574, 0.0487                                                        | 16566, 0.0535                                                       |
| Data/restraints/parameters                                   | 7932/2/683                                                                       | 8870/0/512                                                                       | 8574/42/470                                                         | 16566/499/1030                                                      |
| Goodness-of-fit on <i>F</i> <sup>2</sup>                     | 1.035                                                                            | 1.015                                                                            | 1.022                                                               | 1.019                                                               |
| Final <i>R</i> indexes [ <i>I</i> ≥ 2 $\sigma$ ( <i>I</i> )] | 0.0281, 0.0720                                                                   | 0.0386, 0.0875                                                                   | 0.0443, 0.1260                                                      | 0.0414, 0.1008                                                      |
| Final <i>R</i> indexes [all data]                            | 0.0295, 0.0731                                                                   | 0.0571, 0.0959                                                                   | 0.0471, 0.1289                                                      | 0.0512, 0.1066                                                      |
| Largest diff. peak/hole (e Å <sup>-3</sup> )                 | 0.24/-0.21                                                                       | 0.31/-0.25                                                                       | 0.97/-0.56                                                          | 0.60/-0.46                                                          |
| Flack parameter                                              | 0.027(7)                                                                         | –                                                                                | –                                                                   | –                                                                   |

## **References**

1. R. J. Schwamm, M. P. Coles, M. S. Hill, M. F. Mahon, C. L. McMullin, N. A. Rajabi, A. S. S. Wilson, *Angew. Chem. Int. Ed.* **2020**, *59*, 3928.
2. Dolomanov, O. V.; Bourhis, L.J.; Gildea, R.J.; Howard, J. A. K.; Puschmann, H. *J. Appl. Cryst.* **2009**, *42*, 339-341.
3. Sheldrick, G. M. *Acta Cryst.* **2015**, A71, 3-8.
4. Sheldrick, G. M. *Acta Cryst.* **2015**, C71, 3-8
